# Supplementary material
Source: PubMed Central journal article supplement (PMC3501070)
Supplement: supp_M112.383000_jbc.M112.383000-1.pdf [file supp_M112.383000_jbc.M112.383000-1.pdf]

**Figure S1.** Characterization of RNA ICs. **A-B.** AM14 B cells were stimulated with BWR4 plus the indicated RNA in the presence (A) or absence (B) of IFN- $\beta$ . Proliferation was quantified by [ $^3$ H]thymidine incorporation and plotted as the fold change of the BWR4 alone value. **C.** AM14 B cells were stimulated with 300ng/ml of Alu1-bio RNA with the indicated concentration of 1D4. Proliferation was quantified by [ $^3$ H]thymidine incorporation and plotted as the percent of the response to CpG-B. Average  $\pm$  SEM is shown, n=3.

**Figure S2.** Fab-ICs retain TLR7 dependence in AM14 B cells. A-C, AM14  $\Delta$ , or TLR7 KO  $\square$  B cells were stimulated with the indicated Fab ICs. Proliferation was quantified by [ $^3$ H]thymidine incorporation and plotted as the percent of the response to CpG-B. Average  $\pm$  SEM is shown, n=4
