# Supplementary material
Source: PubMed Central journal article supplement (PMC3501070)
Supplement: supp_M112.383000_jbc.M112.383000-2.pdf [file supp_M112.383000_jbc.M112.383000-2.pdf]

| RNA name  | Antigen           | NCBI Accession | nt  | # U | # C | %TLR7 | G:U + G:C / 100nt | Stimulation |
|-----------|-------------------|----------------|-----|-----|-----|-------|-------------------|-------------|
| Y5        | Ro 60 / SSA       | NR_001571      | 84  | 32  | 18  | 19    | 20                | 57          |
| His-tRNA  | His-tRNA synthase | X01553         | 76  | 19  | 21  | 23    | 22                | 82          |
| RNase MRP | Th/To             | NR_003051      | 282 | 51  | 93  | 26    | 22                | 25          |
| Phe-tRNA  | Phe-tRNA synthase | K00350         | 76  | 10  | 18  | 29    | 22                | 63          |
| Y4        | Ro 60 / SSA       | NR_004393      | 94  | 32  | 19  | 33    | 20                | 49          |
| ser-tRNA  | Ser-tRNA synthase | Y00355         | 73  | 20  | 20  | 33    | 27                | 44          |
| hY3       | Ro 60 / SSA       | NR_004392      | 102 | 36  | 28  | 34    | 18                | 61          |
| iMet-tRNA | Met-tRNA synthase | K00328         | 73  | 11  | 20  | 36    | 22                | 29          |
| EBER-I    | La / SSB          | AB065135       | 154 | 34  | 35  | 40    | 21                | 32          |
| 7SL RNA   | SRP               | X01037         | 332 | 55  | 83  | 42    | 23                | 35          |
| U8        | Fibrillarin       | NR_033273      | 140 | 38  | 34  | 47    | 19                | 65          |
| U14       | Nucleolus         | NR_028275      | 92  | 34  | 19  | 54    | 15                | 23          |
| U1        | U1 - 70KD         | NR_004430      | 164 | 43  | 42  | 58    | 19                | 90          |
| VA-I      | La / SSB          | NC_001460      | 141 | 21  | 40  | 60    | 24                | 40          |
| E3        | Nucleolus         | NR_002586      | 135 | 44  | 31  | 66    | 16                | 47          |
| U6        | Sm                | NR_004394      | 106 | 25  | 24  | 75    | 15                | 59          |
| SS1       | HCV               | EF154702       | 354 | 66  | 114 | 78    | 21                | 21          |
| RNaseP    | Th/To             | NR_002312      | 341 | 59  | 102 | 86    | 26                | 28          |
| mtR-loop  | Mitochondria      | AB033825       | 877 | 297 | 104 | 85    | 16                | 64          |
| U19       | Nucleolus         | NR_002915      | 200 | 65  | 38  | 86    | 21                | 51          |
| rC13      | Control           | EU730881       | 435 | 184 | 200 | 86    | 10                | 87          |
| U5        | Sm                | NR_002756      | 116 | 39  | 23  | 89    | 13                | 78          |
| hY1       | Ro 60 / SSA       | NR_004391      | 113 | 41  | 30  | 90    | 15                | 57          |
| U17       | Nucleolus         | NR_002907      | 300 | 73  | 39  | 94    | 15                | 41          |
| rC11      | control           | EU730879       | 621 | 108 | 105 | 94    | 21                | 22          |
| U24       | Nucleolus         | NR_002447      | 106 | 27  | 20  | 96    | 13                | 73          |
| HCV 3'UTR | HCV               | AF009071       | 269 | 140 | 52  | 96    | 12                | 91          |
| Alu1F     | cytoplasm         | U14571         | 221 | 59  | 69  | 97    | 20                | 52          |
| U3        | Fibrillarin       | NR_006880      | 232 | 60  | 43  | 97    | 19                | 65          |
| E2        | Nucleolus         | NR_002433      | 154 | 43  | 28  | 98    | 10                | 82          |
