# Supplementary material
Source: PubMed Central journal article supplement (PMC3501070)

**A** IFN- $\beta$  primed  
BWR4 activated AM14 B cells

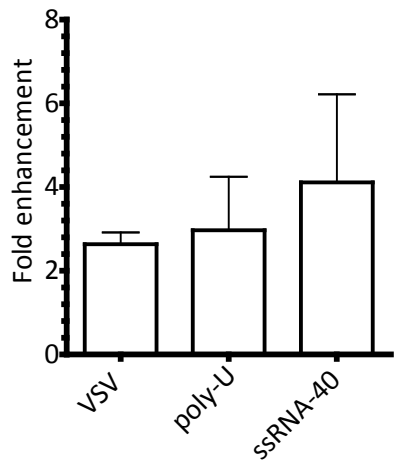

**B** BWR4 activated AM14 B cells

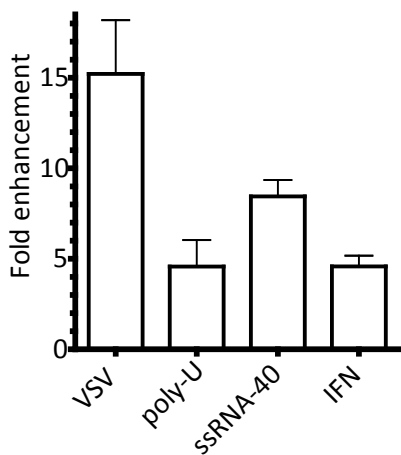

**C** Alu1-bio ICs

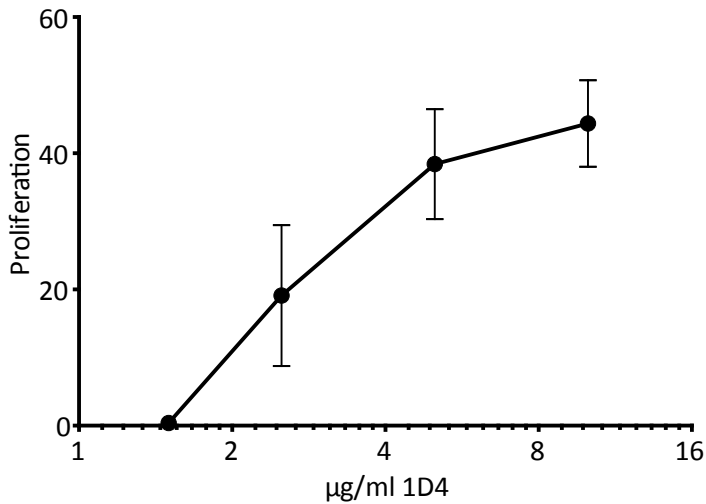

Supplement: supp_M112.383000_jbc.M112.383000-3.pdf [file supp_M112.383000_jbc.M112.383000-3.pdf]

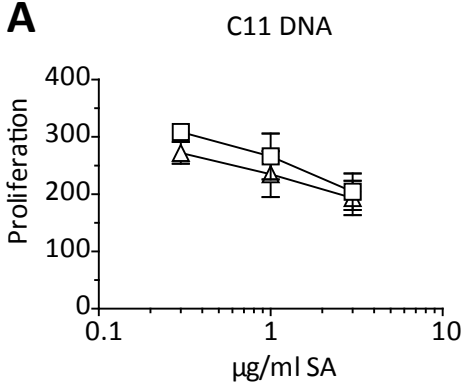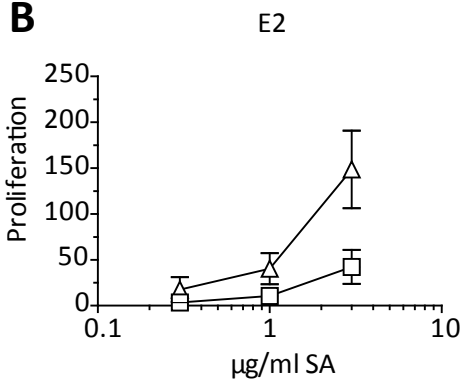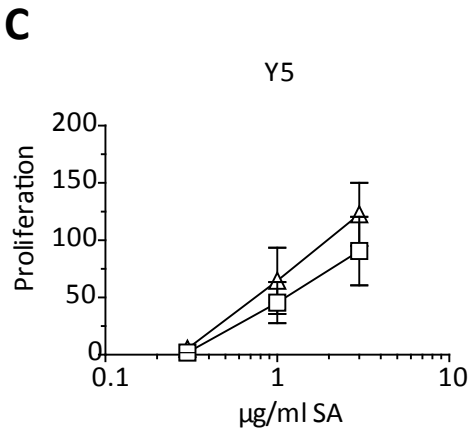

Supplement: supp_M112.383000_jbc.M112.383000-4.pdf [file supp_M112.383000_jbc.M112.383000-4.pdf]
